# Supplementary material
Source: PubMed Central journal article supplement (PMC5612367)
Supplement: NIHMS903238-supplement-ESI.pdf [file NIHMS903238-supplement-ESI.pdf]

## Supplementary Information

### RNA sequences

1. Homo sapiens keratin 18, type I (KRT18), transcript variant 2, mRNA.

ATGAGCTTCACCACTCGCTCCACCTTCTCCACCAACTACCGGTCCCTGGG  
CTCTGTCCAGGCGCCCAGCTACGGCGCCCGGCGGTTCAGCAGCGCGGCCA  
GCGTCTATGCAGGCGCTGGGGGCTCTGGTTCCCGGATCTCCGTGTCCCGC  
TCCACCAGCTTCAGGGGCGGCATGGGGTCCGGGGGCCTGGCCACCGGGAT  
AGCCGGGGGTCTGGCAGGAATGGGAGGCATCCAGAACGAGAAGGAGACCA  
TGCAAAGCCTGAACGACCGCCTGGCCTCTTACCTGGACAGAGTGAGGAGC  
CTGGAGACCGAGAACCGGAGGCTGGAGAGCAAAATCCGGGAGCACTTGA  
GAAGAAGGGACCCCAGGTCAGAGACTGGAGCCATTACTTCAAGATCATCG  
AGGACCTGAGGGCTCAGATCTTCGCAAATACTGTGGACAATGCCCGCATC  
GTTCTGCAGATTGACAATGCCCGTCTTGCTGCTGATGACTTTAGAGTCAA  
GTATGAGACAGAGCTGGCCATGCGCCAGTCTGTGGAGAACGACATCCATG  
GGCTCCGCAAGGTCATTGATGACACCAATATCACACGACTGCAGCTGGAG  
ACAGAGATCGAGGCTCTCAAGGAGGAGCTGCTCTTCATGAAGAAGAACCA  
CGAAGAGGAAGTAAAAGGCCTACAAGCCCAGATTGCCAGCTCTGGGTTGA  
CCGTGGAGGTAGATGCCCCAAATCTCAGGACCTCGCCAAGATCATGGCA  
GACATCCGGGCCCAATATGACGAGCTGGCTCGGAAGAACCGAGAGGAGCT  
AGACAAGTACTGGTCTCAGCAGATTGAGGAGAGCACCCACAGTGGTCACCA

CACAGTCTGCTGAGGTTGGAGCTGCTGAGACGACGCTCACAGAGCTGAGA  
CGTACAGTCCAGTCCTTGGAGATCGACCTGGACTCCATGAGAAATCTGAA  
GGCCAGCTTGGAGAACAGCCTGAGGGAGGTGGAGGCCCGCTACGCCCTAC  
AGATGGAGCAGCTCAACGGGATCCTGCTGCACCTTGAGTCAGAGCTGGCA  
CAGACCCGGGCAGAGGGACAGCGCCAGGCCAGGAGTATGAGGCCCTGCT  
GAACATCAAGGTCAAGCTGGAGGCTGAGATCGCCACCTACCGCCGCCTGC  
TGGAAGATGGCGAGGACTTTAATCTTGGTGATGCCTTGGACAGCAGCAAC  
TCCATGCAAACCATCCAAAAGACCACCACCCGCCGGATAGTGGATGGCAA  
AGTGGTGTCTGAGACCAATGACACCAAAGTTCTGAGGCATTAA

2. Homo sapiens keratin 19, type I (KRT19), mRNA.

ATGACTTCCTACAGCTATCGCCAGTCGTCGGCCACGTCGTCCTTCGGAGG  
CCTGGGCGGCGGCTCCGTGCGTTTTGGGCCGGGGGTCGCCTTTCGCGCGC  
CCAGCATTACGGGGGCTCCGGCGGCGCGGCGTATCCGTGTCCTCCGCC  
CGCTTTGTGTCCTCGTCCTCCTCGGGGGCCTACGGCGGGCGGCTACGGCGG  
CGTCCTGACCGCGTCCGACGGGCTGCTGGCGGGCAACGAGAAGCTAACCA  
TGCAGAACCTCAACGACCGCCTGGCCTCCTACCTGGACAAGGTGCGCGCC  
CTGGAGGCGGCCAACGGCGAGCTAGAGGTGAAGATCCGCGACTGGTACCA  
GAAGCAGGGGCCTGGGCCCTCCCGCGACTACAGCCACTACTACACGACCA  
TCCAGGACCTGCGGGACAAGATTCTTGGTGCCACCATTGAGAACTCCAGG

ATTGTCCTGCAGATCGACAATGCCCGTCTGGCTGCAGATGACTTCCGAAC  
CAAGTTTGAGACGGAACAGGCTCTGCGCATGAGCGTGGAGGCCGACATCA  
ACGGCCTGCGCAGGGTGCTGGATGAGCTGACCCTGGCCAGGACCGACCTG  
GAGATGCAGATCGAAGGCCTGAAGGAAGAGCTGGCCTACCTGAAGAAGAA  
CCATGAGGAGGAAATCAGTACGCTGAGGGGCCAAGTGGGAGGCCAGGTCA  
GTGTGGAGGTGGATTCCGCTCCGGGCACCGATCTCGCCAAGATCCTGAGT  
GACATGCGAAGCCAATATGAGGTCATGGCCGAGCAGAACCGGAAGGATGC  
TGAAGCCTGGTTCACCAGCCGACTGAAGAATTGAACCGGGAGGTGCTG  
GCCACACGGAGCAGCTCCAGATGAGCAGGTCCGAGGTTACTGACCTGCGG  
CGCACCTTCAGGGTCTTGAGATTGAGCTGCAGTCACAGCTGAGCATGAA  
AGCTGCCTTGGAAGACACACTGGCAGAAACGGAGGCGCGCTTTGGAGCCC  
AGCTGGCGCATATCCAGGCGCTGATCAGCGGTATTGAAGCCCAGCTGGGC  
GATGTGCGAGCTGATAGTGAGCGGCAGAATCAGGAGTACCAGCGGCTCAT  
GGACATCAAGTCGCGGCTGGAGCAGGAGATTGCCACCTACCGCAGCCTGC  
TCGAGGGACAGGAAGATCACTACAACAATTTGTCTGCCTCCAAGGTCCTC  
TGA

3. Homo sapiens protein tyrosine phosphatase, receptor type, C (PTPRC), transcript variant 2, mRNA.

ATGACCATGTATTTGTGGCTTAACTCTTGGCATTGGCTTTGCCTTTCT  
GGACACAGAAGTATTTGTGACAGGGCAAAGCCCAACACCTTCCCCCACTG

ATGCCTACCTTAATGCCTCTGAAACAACCACTCTGAGCCCTTCTGGAAGC  
GCTGTCATTTCAACCACAACAATAGCTACTACTCCATCTAAGCCAACATG  
TGATGAAAAATATGCAAACATCACTGTGGATTACTTATATAACAAGGAAA  
CTAAATTATTTACAGCAAAGCTAAATGTTAATGAGAATGTGGAATGTGGA  
ACAATACTTGCACAAACAATGAGGTGCATAACCTTACAGAATGTAAAAA  
TGCGTCTGTTTCCATATCTCATAATTCATGTACTGCTCCTGATAAGACAT  
TAATATTAGATGTGCCACCAGGGGTTGAAAAGTTTCAGTTACATGATTGT  
ACACAAGTTGAAAAAGCAGATACTACTATTTGTTTAAAATGGAAAAATAT  
TGAAACCTTTACTTGTGATACACAGAATATTACCTACAGATTTTCAGTGTG  
GTAATATGATATTTGATAATAAAGAAATTAATTAGAAAACCTTGAACCC  
GAACATGAGTATAAGTGTGACTCAGAAATACTCTATAATAACCACAAGTT  
TACTAACGCAAGTAAAATTATTAACAGATTTTGGGAGTCCAGGAGAGC  
CTCAGATTATTTTTGTAGAAGTGAAGCTGCACATCAAGGAGTAATTACC  
TGGAATCCCCCTCAAAGATCATTTCATAATTTACCCTCTGTTATATAAA  
AGAGACAGAAAAAGATTGCCTCAATCTGGATAAAAACCTGATCAAATATG  
ATTTGCAAAATTTAAAACCTTATACGAAATATGTTTTATCATTACATGCC  
TACATCATTGCAAAAGTGCAACGTAATGGAAGTGCTGCAATGTGTCATTT  
CACAACATAAAGTGCTCCTCCAAGCCAGGTCTGGAACATGACTGTCTCCA  
TGACATCAGATAATAGTATGCATGTCAAGTGTAGGCCTCCCAGGGACCGT  
AATGGCCCCCATGAACGTTACCATTTGGAAGTTGAAGCTGGAATACTCT  
GGTTAGAAATGAGTCGCATAAGAATTGCGATTTCCGTGTAAGATCTTC

AATATTCAACAGACTACACTTTTAAGGCCTATTTTCACAATGGAGACTAT  
CCTGGAGAACCCTTTATTTTACATCATTCAACATCTTATAATTCTAAGGC  
ACTGATAGCATTCTGGCATTCTGATTATTGTGACATCAATAGCCCTGC  
TTGTTGTTCTCTACAAAATCTATGATCTACATAAGAAAAGATCCTGCAAT  
TTAGATGAACAGCAGGAGCTTGTTGAAAGGGATGATGAAAAACAACCTGAT  
GAATGTGGAGCCAATCCATGCAGATATTTTGTTGGAACTTATAAGAGGA  
AGATTGCTGATGAAGGAAGACTTTTTCTGGCTGAATTCAGAGCATCCCG  
CGGGTGTTCAAGCAAGTTTCCTATAAAGGAAGCTCGAAAGCCCTTTAACCA  
GAATAAAAACCGTTATGTTGACATTCTTCCTTATGATTATAACCGTGTTG  
AACTCTCTGAGATAAACGGAGATGCAGGGTCAAACCTACATAAATGCCAGC  
TATATTGATGGTTTCAAAGAACCCAGGAAATACATTGCTGCACAAGGTCC  
CAGGGATGAAACTGTTGATGATTTCTGGAGGATGATTTGGGAACAGAAAG  
CCACAGTTATTGTCATGGTCACTCGATGTGAAGAAGGAAACAGGAACAAG  
TGTGCAGAATACTGGCCGTCAATGGAAGAGGGCACTCGGGCTTTTGGAGA  
TGTTGTTGTAAAGATCAACCAGCACAAAAGATGTCCAGATTACATCATT  
AGAAATTGAACATTGTAAATAAAAAAGAAAAAGCAACTGGAAGAGAGGTG  
ACTCACATTCAGTTCACCAGCTGGCCAGACCACGGGGTGCCTGAGGATCC  
TCACTTGCTCCTCAAACCTGAGAAGGAGAGTGAATGCCTTCAGCAATTTCT  
TCAGTGGTCCCATTGTGGTGCAGTGCAGTGGTGGTGGGCGCACAGGA  
ACCTATATCGGAATTGATGCCATGCTAGAAGGCCTGGAAGCCGAGAACAA  
AGTGGATGTTTATGGTTATGTTGTCAAGCTAAGGCGACAGAGATGCCTGA

TGGTTCAAGTAGAGGCCAGTACATCTTGATCCATCAGGCTTTGGTGGAA  
TACAATCAGTTTGGAGAAACAGAAGTGAATTTGTCTGAATTACATCCATA  
TCTACATAACATGAAGAAAAGGGATCCACCCAGTGAGCCGTCTCCACTAG  
AGGCTGAATTCCAGAGACTTCCTTCATATAGGAGCTGGAGGACACAGCAC  
ATTGGAAATCAAGAAGAAAATAAAAGTAAAAACAGGAATTCTAATGTCAT  
CCCATATGACTATAACAGAGTGCCACTTAAACATGAGCTGGAAATGAGTA  
AAGAGAGTGAGCATGATTCAGATGAATCCTCTGATGATGACAGTGATTCA  
GAGGAACCAAGCAAATACATCAATGCATCTTTTATAATGAGCTACTGGAA  
ACCTGAAGTGATGATTGCTGCTCAGGGACCACTGAAGGAGACCATTGGTG  
ACTTTTGGCAGATGATCTTCCAAGAAAAGTCAAAGTTATTGTTATGCTG  
ACAGAACTGAAACATGGAGACCAGGAAATCTGTGCTCAGTACTGGGGAGA  
AGGAAAGCAAACATATGGAGATATTGAAGTTGACCTGAAAGACACAGACA  
AATCTTCAACTTATACCCTTCGTGTCTTTGAACTGAGACATTCCAAGAGG  
AAAGACTCTCGAACTGTGTACCAGTACCAATATACAACTGGAGTGTGGA  
GCAGCTTCTGCAGAACCCAAGGAATTAATCTCTATGATTCAGGTCGTCA  
AACAAAACTTCCCCAGAAGAATTCCTCTGAAGGGAACAAGCATCACAAG  
AGTACACCTCTACTCATTCACTGCAGGGATGGATCTCAGCAAACGGGAAT  
ATTTTGTGCTTTGTTAAATCTCTTAGAAAGTGCGGAAACAGAAGAGGTAG  
TGGATATTTTTCAAGTGGTAAAAGCTCTACGCAAAGCTAGGCCAGGCATG  
GTTTCCACATTCGAGCAATATCAATTCCTATATGACGTCATTGCCAGCAC  
CTACCCTGCTCAGAATGGACAAGTAAAGAAAAACAACCATCAAGAAGATA

AAATTGAATTTGATAATGAAGTGGACAAAGTAAAGCAGGATGCTAATTGT  
GTTAATCCACTTGGTGCCCCAGAAAAGCTCCCTGAAGCAAAGGAACAGGC  
TGAAGGTTCTGAACCCACGAGTGGCACTGAGGGGCCAGAACATTCTGTCA  
ATGGTCCTGCAAGTCCAGCTTTAAATCAAGGTTTCATAG

4. Homo sapiens catenin (cadherin-associated protein), delta 1 (CTNND1), transcript variant 21, mRNA.

ATGCAGGAGCCGGGGCAGATTGTGGAGACCTACACGGAGGAGGATCCTGA  
GGGAGCCATGTCTGTAGTCTCTGTGGAGACCTCAGATGATGGGACCACTC  
GGCGCACAGAGACCACGGTCAAGAAAGTAGTGAAGACTGTGACAACACGG  
ACAGTACAGCCAGTCGCTATGGGACCAGACGGGTTGCCTGTGGATGCTTC  
ATCAGTTTCTAACAACCTATATCCAGACTTTGGGTCGTGATTTCCGCAAGA  
ATGGCAATGGGGGACCTGGTCCCTATGTGGGGCAAGCTGGCACTGCTACC  
CTTCCTAGGAACTTCCACTACCCTCCTGATGGTTATAGTCGCCACTATGA  
AGATGGTTATCCAGGTGGCAGTGATAACTATGGCAGTCTGTCCCGGGTGA  
CCCGCATTGAGGAGCGGTATAGGCCCAGCATGGAAGGCTACCGGGCACCT  
AGTAGACAGGATGTGTATGGGCCCAACCCCAAGGTTCCGGGTAGGTGGGAG  
CAGCGTGGATCTGCATCGCTTTCATCCAGAGCCTTATGGGCTAGAGGATG  
ACCAGCGTAGTATGGGCTATGATGACCTGGATTATGGTATGATGTCTGAT  
TATGGCACTGCCCGTCGGACTGGGACACCCTCTGACCCTCGTCGGCGCCT  
CAGGAGCTATGAAGACATGATTGGTGAGGAGGTGCCATCGGATCAATACT

ACTGGGCTCCTTTGGCCCAGCATGAGCGAGGAAGTTTAGCAAGCTTGGAT  
AGCCTGCGCAAAGGAGGGCCTCCACCTCCTAATTGGAGACAGCCAGAGCT  
GCCAGAGGTGATCGCCATGCTTGGATTCCGCTTGGATGCTGTCAAGTCCA  
ATGCAGCTGCATACCTGCAACACTTATGCTACCGCAATGACAAGGTGAAG  
ACTGACGTGCGGAAGCTCAAGGGCATCCCAGTACTGGTGGGATTGTTAGA  
CCATCCCAAAAAGGAAGTGACCTTGGAGCCTGTGGAGCTCTCAAGAATA  
TCTCTTTTGGACGTGACCAGGATAACAAGATTGCCATAAAAACTGTGAT  
GGTGTGCCTGCCCTTGTGCGATTGCTTCGAAAGGCTCGTGATATGGACCT  
TACTGAAGTTATTACCGGAACCCTGTGGAATCTTTCATCCCATGACTCAA  
TCAAATGGAGATTGTGGACCATGCACTGCATGCCTTGACAGATGAAGTG  
ATCATTCCCTCATTCTGGTTGGGAGCGGGAACCTAATGAAGACTGTAAGCC  
ACGCCACATTGAGTGGGAATCGGTGCTCACCAACACAGCTGGCTGCCTTA  
GGAATGTAAGCTCAGAGAGGAGTGAAGCTCGCCGAAACTTCGGGAATGT  
GATGGTTTAGTTGATGCCCTCATTTCATTGTTTCCAGGCTGAGATTGGGCA  
GAAGGATTCAGACAGCAAGCTTGTAGAGAACTGTGTTTGCCTTCTTCGGA  
ACTTATCATATCAAGTTCACCGGGAGATCCCACAGGCAGAGCGTTACCAA  
GAGGCAGCTCCCAATGTTGCCAACAATACTGGGCCACATGCTGCCAGTTG  
CTTTGGGGCCAAGAAGGGCAAAGGGAAAAAACCTATAGAGGATCCAGCAA  
ACGATACAGTGGATTTCCCTAAAAGAACGAGTCCAGCTCGAGGCTATGAG  
CTCTTATTTTCCAGCCAGAGGTGGTTCCGATATACATCTCACTTCTTAAGGA  
GAGCAAGACTCCTGCCATCCTAGAAGCCTCAGCTGGAGCTATCCAGAAGT



TGTGTGCTGGGCGCTGGACGTATGGTCGATACATCCGCTCTGCTCTGCGT  
CAAGAGAAGGCTCTTTCTGCCATAGCTGACCTCCTGACTAATGAACATGA  
ACGGGTGGTCAAAGCTGCATCTGGAGCACTGAGAAACCTGGCTGTGGATG  
CTCGCAACAAAGAATTAATTGGTAAACATGCTATTCCTAACTTGGTAAAG  
AATCTGCCAGGAGGACAGCAGAACTCCTCTTGGAATTTCTCTGAGGACAC  
TGTTCATCTCTATTTTGAACACTATCAACGAGGTTATCGCTGAGAACTTGG  
AGGCTGCCAAAAAGCTTCGAGAGACACAGGGTATTGAGAAGCTGGTGTTG  
ATCAACAAATCAGGGAACCGCTCAGAAAAAGAAGTTCGAGCAGCAGCACT  
TGTATTACAGACAATCTGGGGATATAAGGAACTGCGGAAGCCACTGGAAA  
AAGAAGGATGGAAGAAATCAGACTTTCAGGTGAATCTAAACAATGCTTCC  
CGAAGCCAGAGCAGTCATTCATATGATGATAGTACTCTCCCTCTCATTGA  
CCGGAACCAAAAATCAGATAAGAAACCTGATCGGGAAGAAATTCAGATGA  
GCAATATGGGATCAAACACAAAATCACTAGATAACAACCTATTCCACACCA  
AATGAGAGAGGAGACCACAATAGAACACTGGATCGATCGGGGGATCTAGG  
CGACATGGAGCCATTGAAGGGAACAACACCCTTGATGCAGAAGATTTAG

##### 5. d2egfp

CAAATAAAGCAATAGCACAAATTTACAAATAAATTTTTTTTCACTGCATTCTTGTGGTTTGTCC  
AAACTCAATGTATCTTATCATAACGAATTCCTACACATTATCCTAGCAGAAGCACATGCAGGGT  
GACGGTCCACGCTCTCCTGGGCACAAATGGGCAGCGTGCCATCCTGCTCCTCCACCTCCG  
GAAGCCATGGCTAAGCTTGTACAGCTCGTCCATGAGAGTGATCCCGGCGGTACGAACTCC  
AGCAGGATGTGATCGCGCTTCTCGGGGTCTTTGCTCAGGGACTGGGTGCTCAGGTAGTTG

TCGGGCAGCAGCACGCCGTCGCCGATGGGGGTCTGCTGGTAGTGGTTCGAGCTGCACGCT  
GCCGTCGATGTTGTGGCGGATCTAGTTCACCTTGATGCCGTTCTGCTTGTTCGGCCATATAGA  
CGTTGTGGCTGTAGTTGTACTIONCAGCTTGCCCAGGATGTTGCCGTCCTTGAAGTCGATGCC  
CTGCTCGATGCGGTTACCGTGTCCGCTCGAACTTCTCGGCGCGGGTCTTGTTCGGCTC  
GTCCTTGAAGATGGTGCCTCCTGGACGCCTTCGGGCATGGCGGTGAAGAAGTCGTGCTG  
CATGTGGTCGGGGTAGCGGAAGCACTGCACGCCGTTCCAGGGTGGTTCACGAGGGGCCAGG  
GCACGGGCAGGCCGGTGGTGCAGATGATCAGGGTCAGCTTGCCGGTGGCATCGCCCTCG  
CCGCCGGACACGCTGAACTGGCCGTTTACGTCGCCGAGCTCGACCAGGATGGGCACCCC  
GGTGAACAGCTCGCCCTTGCTCACCATC

#### 6. Mouse ECad

GTGTAGACCTCGGAACTGAATGCATCCTTCAAATCTCACTGAATCGGGAGTCTTCCGAAAAG  
CTTGTGGAGCTTTAGATGGGTACACGCTGGGAAACATGGGATTTGATCTGAACCAGGTCTG  
TGATCACTATCTCCATGCTGTTGTCATTCTGATCTGTTCTGCAACGAATCCCTCAAATTGTAG  
GTGTTGACGTCATCTGTCCCTATTGACAGTGAACAGAGGTGAGCACACTGATGACCAGAGT  
GTATGTAGGGTAACATCATCATCGGTCACTTTGGATCGTTGACTACGGTGTACTGGCTGTTTT  
CAAATGCCAAAGGATGTATTGCTGCTTGGATCCGATACGTGATCTTCTGGAAAATGGCACC  
AGTCTCTGCATATGTGCTGTTCTTACAATCATCTGTGGCGATGATGAACAGGACCAGGAGA  
AGAGTGAAGGTCTGGATCCAAGATGGTCTTGAGCTGCGTCATTATAGTCCTTTCTTGGTTGC  
AAAATTTTGTATTGCCAATCTCTTGGTCTTTGTTCTGGTTATCGATGGCAGGAACTTGCAAT  
CCCGTAGAAACAGTAGGAGCAGGCTCAAATCAAAGTCCTGGCCAACAGAGAGTCGTAAGG  
GAGATAATCGTAGTCCTGGTC

#### 7. human ECad

TCAAATTCACCTCTGCCCAGACTTTGAATCGGGTGTTCGAGGCCTTTTACTGTAATCACATG  
TATTCAGCGTGACTTTGGATGTGAGCAATTCTGCTTGGGCAGCTGATGGGAGGAATAAAGG

TTTTTAGGAAATGGGCCTAAAGACACCAACAGGGGGTAATGCGTTCTCTATCCAGAGTGGAT  
GACACAGCGTGAGAGGTTGTCATTCTGATCGGTTATTAAAGACCTCCTGGGTGAATGTAGGT  
GTTACATCATCGTTGGCTGAGGATGGTGTAAGTGTGTTCTGTTAATGGTGACCAGGGTAT  
ACGTAGGGAAATTATCGTTGGTGTGTCAGTGACTGGTGGGATTGAAGATCGGAAATTGTCCAC  
CATCATCATTGTTCACTGGATTTGTGGTGCAGTGTAGGATGTGATTTCTTCCATAAATGTG  
TCTGGCTTCTCTCCAAATCCGATATGTTTCACGTGCTCAAATCCTCCTGGAGAACCATTGT  
CTGTAACAGGATCAGCAGAAGTGTCTAGTTCTGCTGTGAAGGGAGTGGGTCGTTGTACTGA  
ATGGATGGCAGGAATTTGCAATCCCGCTTCCTTCATAGTCAAACCTTTGTCTGACTCTGAGG  
AGTTCAAGTAGTCATAGTCCT

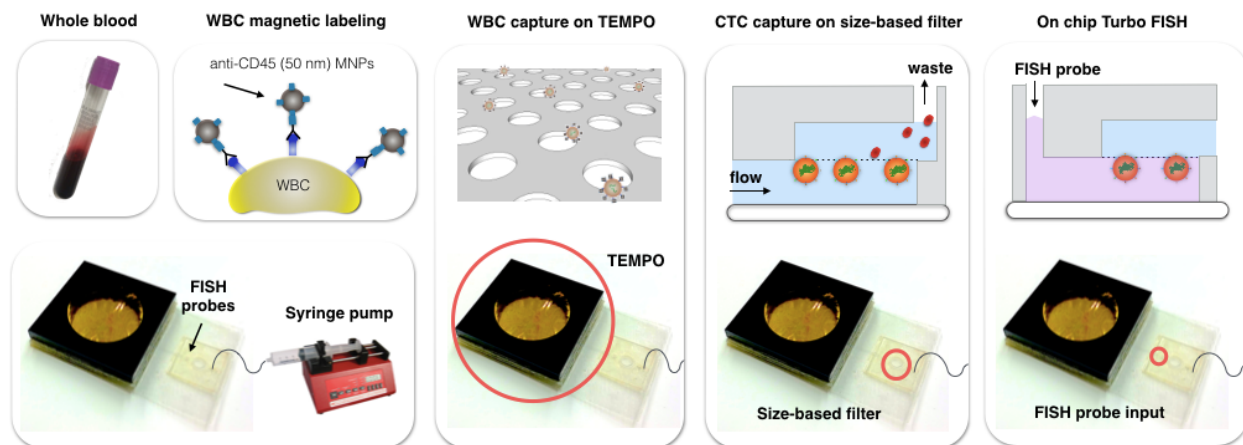

**Fig. S1. A Schematic of the step-by-step operation of our CaTCh FISH Chip.** From whole blood, WBCs are magnetically labeled with anti-CD45 MNPs for negative depletion. Labeled WBCs are captured on TEMPO at the upstream. Then, WBC-depleted whole blood travels through the device and potential CTCs are captured on the size-based filter where RBCs continuously move through the filter with the flow and are removed through the waste outlet. Finally, FISH probes are introduced and incubated on chip for 5 mins. After wash, we directly image single RNA molecules of CTCs captured in the device.

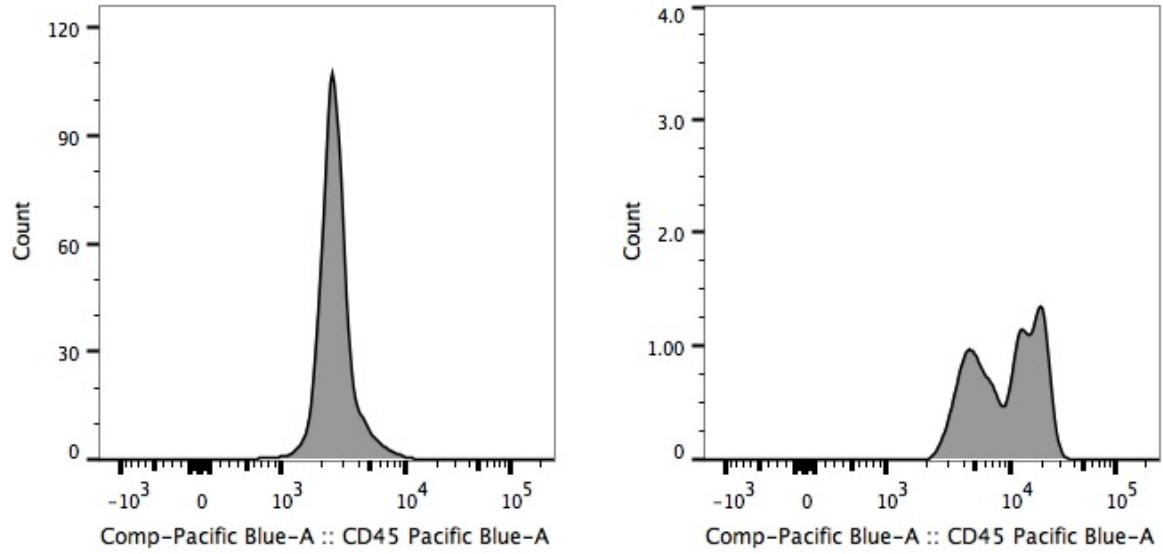

**Fig. S2.** Flow Cytometry Profiling of CD45 expression of leukocytes in the input **(a)** and the output **(b)** of the CaTCh FISH platform. The cells from the output do not have low CD45 expression, leading to the conclusion that heterogeneity in CD45 expression did not play a major role in the performance of our device. All cells were stained with Cell Tracker (Fisher) to enable all cells to be gated and their CD45 profiled, even those potentially negative for CD45.

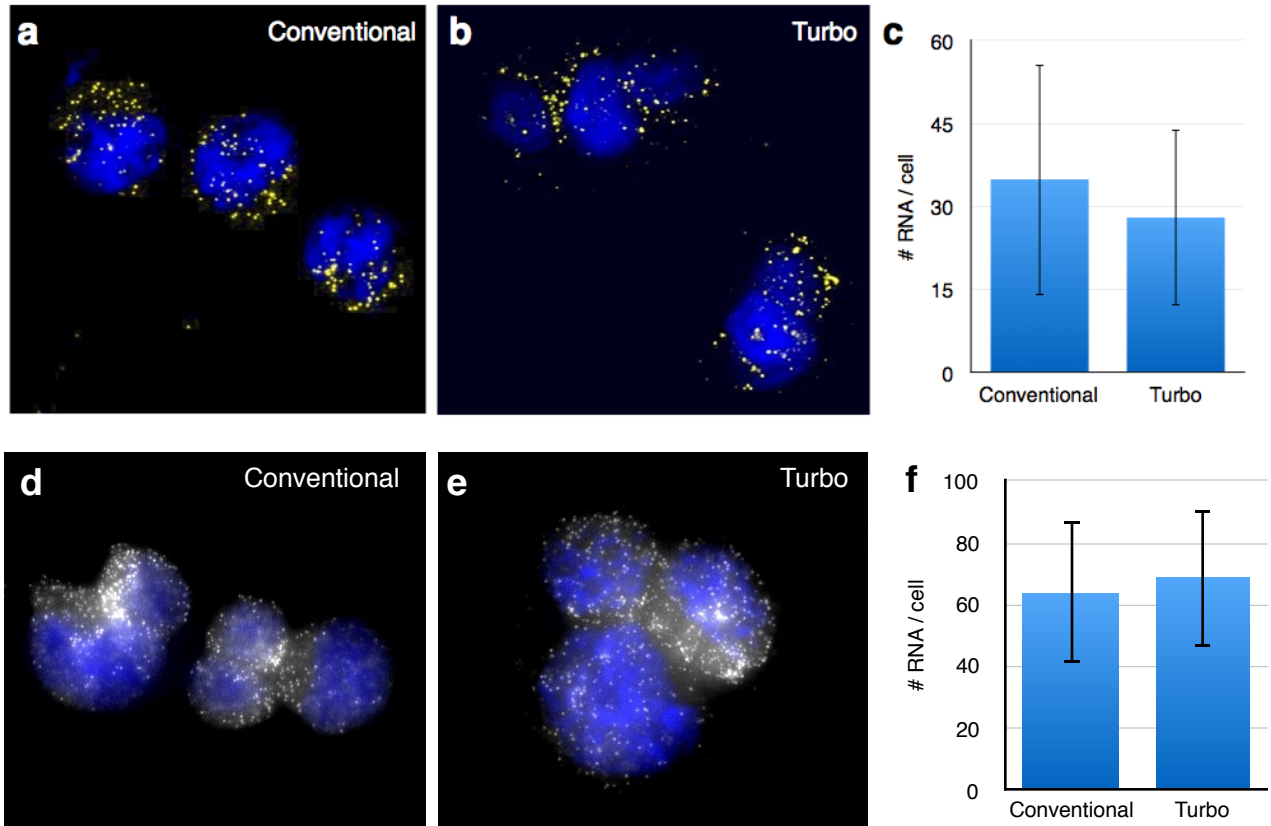

**Fig. S3. Comparison of conventional and Turbo RNA FISH.** We directly compare the number of CD45 RNA measured per cell (Jurkat) using conventional single molecule RNA FISH (**a**) and our Turbo RNA FISH protocol (**b**), and showed that there was not a significant difference in the number of (**c**) punctates. ( $P = 0.32$ ) Each image is a representative image of  $N = 20$  cells. Error bars represent standard deviation. We also compare the number of CK19 RNA measured per cell (PD7591) using conventional single molecule RNA FISH (**d**) and our Turbo RNA FISH protocol (**e**), and showed that there was not a significant difference in the number of (**f**) punctates. ( $P = 0.29$ ) Each image is a representative image of  $N = 50$  cells. Error bars represent standard deviation.

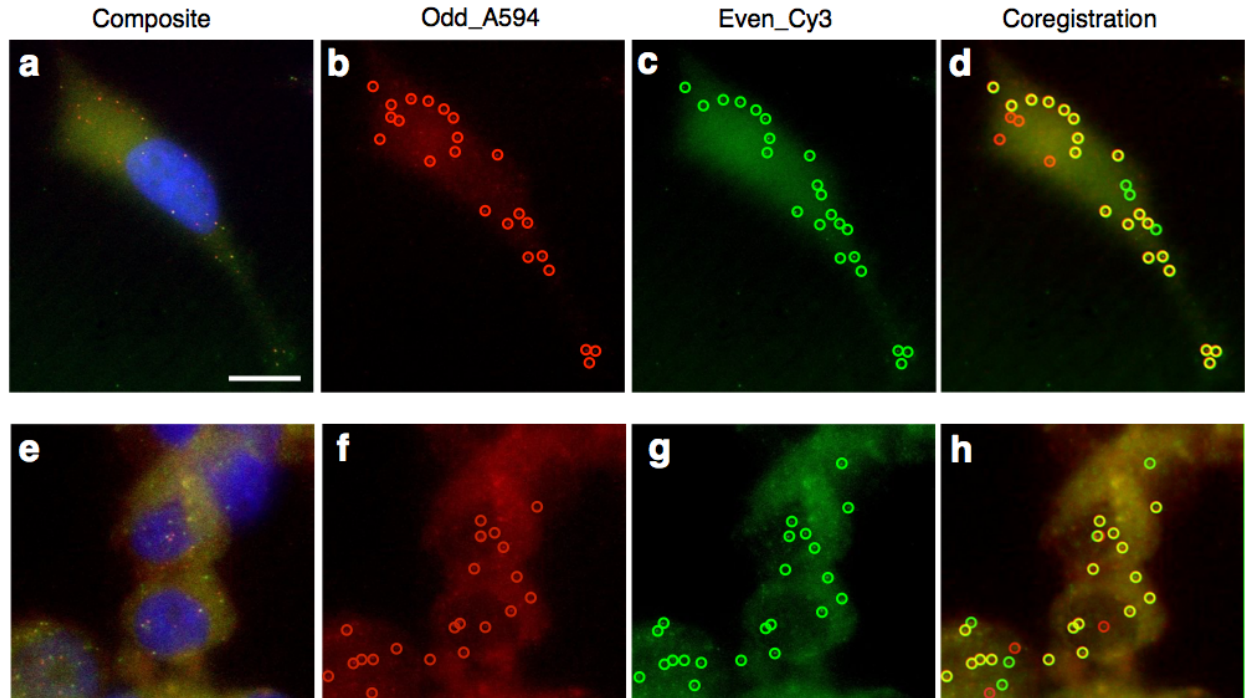

**Fig. S4. Quantification of sensitivity and specificity of RNA FISH using odds and evens co-localization.** We quantify the rate of falsely positive and falsely negative punctates using our Turbo FISH method by labeling the same strand of RNA with two differently colored probes, in both TurboFISH on a glass slide (**a-d**) and on our chip (**e-h**). We partitioned the probe set (32 oligos) to the even and odd numbered oligonucleotides and coupled each subset with a different fluorophore (odds: Alexa 594 (**b**), evens: Cy3 (**c**)). **a**. Composite image of DAPI and RNA punctates using TurboFISH on a glass slide. (scale bar = 10  $\mu\text{m}$ ) **d**. Co-localization between **b** and **c** is shown, wherein yellow circles represent co-localization, red indicate only an odd punctate and green only an even punctate. For TurboFISH on a glass slide, 76% of our punctates co-registered, (N = 20 cells) consistent with previously published results using conventional single molecule RNA FISH.<sup>48</sup> For on-chip Turbo FISH, we found 79% co-registration (N=15 cells), also consistent with previously published results.

|          | CK18        | CK19        | Ctnnd1      | Ecad        | Cocktail     | CD45        |
|----------|-------------|-------------|-------------|-------------|--------------|-------------|
| Jurkat   | 0           | 0           | 0           | 0           | 0            | 57 ± 4.24   |
| MiaPaCa2 | 8.67 ± 0.47 | 2.65 ± 0.56 | 18 ± 2.83   | 0           | 29.31 ± 2.81 | 0           |
| AsPC-1   | 10.9 ± 0.79 | 16.5 ± 2.12 | 15.8 ± 1.13 | 56.6 ± 0.96 | 99.7 ± 3.68  | 3.56 ± 0.02 |
| Capan2   | 23.1 ± 1.03 | 29 ± 1.41   | 34 ± 0      | 28 ± 4.24   | 114.1 ± 2.2  | 0.83 ± 0.24 |

Mean ± Standard deviation

**Fig. S5. Raw counts of RNA punctates for RNA marker validation.** We counted individual RNA molecules from RNA FISH images for CK18, CK19, Ctnnd1, ECad, CD45 from Jurkat, MiaPaCa2, AsPC-1, and Capan2 pancreatic human cell lines. Reported numbers are the average of RNA punctates per cell from two independent experiments, with standard deviation.



|                                              | PDAC patients (n=12) |
|----------------------------------------------|----------------------|
| Median age (range)                           | 66 (51-83)           |
| Sex                                          |                      |
| Male                                         | 6 (50%)              |
| Female                                       | 6 (50%)              |
| Metastatic Disease                           |                      |
| M0 (No metastases)                           | 3 (25%)              |
| M1 (Metastases)                              | 9 (75%)              |
| ECOG Status                                  |                      |
| 0                                            | 6 (50%)              |
| 1                                            | 6 (50%)              |
| 2+                                           | -                    |
| Treatment status at draw <sub>1</sub> (n=14) |                      |
| Pre-Treatment                                | 8 (57%)              |
| Post- Resection                              | 2 (14%)              |
| On Chemotherapy                              | 4 (29%)              |

<sup>1</sup> 14 total samples were tested, two patients had a second draw after medical intervention

**Fig. S6. Patient demographic information.** Patient demographic information includes median age, sex, the presence of metastasis, Eastern Cooperative Oncology Group (ECOG) status, and treatment status.
